# Microsecond resolved infrared spectroscopy on non-repetitive protein reactions by applying caged-compounds and quantum cascade laser frequency combs

Mohamad Javad Norahan<sup>1,2</sup>, Raphael Horvath<sup>3</sup>, Nathalie Woitzik<sup>1,2</sup>, Pierre Jouy<sup>3</sup>, Florian Eigenmann<sup>3</sup>, Klaus Gerwert<sup>1,2</sup>, and Carsten Kötting<sup>1,2</sup>

AUTHOR ADDRESS <sup>1</sup>Biospectroscopy, Center of Protein Diagnostics, Ruhr University Bochum, Bochum, Germany. <sup>2</sup>Department of Biophysics, Ruhr University Bochum, Bochum, Germany. <sup>3</sup>IRsweep AG, Laubisruetistrasse 44, 8712 Staefa, Switzerland.

**ABSTRACT:** Infrared spectroscopy is ideally suited for the investigation of protein reactions at the atomic level. Many systems were investigated successfully by applying Fourier transform infrared (FTIR) spectroscopy. While rapid-scan FTIR spectroscopy is limited by time resolution (about 10 ms with 16 cm<sup>-1</sup> resolution), step-scan FTIR spectroscopy reaches a time-resolution of about 10 ns but is limited to cyclic reactions that can be repeated hundreds of times under identical conditions. Consequently, FTIR with high time resolution was only possible with photoactivable proteins that undergo a photocycle. The huge number of non-repetitive reactions, e.g. induced by caged compounds, were limited to the ms time domain. The advent of dual comb quantum cascade laser allows now for a rapid reaction monitoring in the  $\mu$ s time domain. Here we investigate the potential to apply such an instrument to the huge class of G-proteins. We compare caged-compound induced reactions monitored by FTIR and dual comb spectroscopy, respectively, by applying the new technique to the  $\alpha$  subunit of the inhibiting G<sub>i</sub> protein and to the larger protein-protein complex of G $\alpha_i$  with its cognate regulator of G-protein signaling (RGS). We observe good data quality with 4  $\mu$ s time resolution with a wavelength resolution comparable to FTIR. This is more than three orders of magnitude faster than any FTIR measurement on G-proteins in the literature. This study paves the way for infrared spectroscopic studies in the so far unresolvable  $\mu$ s time regime for non-repetitive biological systems including all GTPases and ATPases.

FTIR spectrometers revolutionized infrared spectroscopy in the 70s of the last century.<sup>1</sup> Likely, the advent of stable mid-IR quantum cascade lasers (QCLs) will impact infrared spectroscopy to the same extent. Conventional QCLs are superior with regard to brilliance,<sup>2</sup> but they lack the multiplex advantage of FTIR that is especially helpful in time-resolved measurements of proteins. For systems that can be excited repetitively, step-scan FTIR can provide time-resolved spectra with ns resolution.<sup>3</sup> For these repetitive systems, tunable QCLs provide time resolved spectra with 1 ns.<sup>2,4</sup> Pump-probe experiments (vis-pump and IR probe) even allow for femtosecond time-resolved IR spectroscopy.<sup>5</sup> However, samples that allow only single excitations can either be measured only at a single wavelength<sup>6</sup> or with rapid-scan FTIR.<sup>7</sup> The time-resolution of rapid-scan FTIR depends on the scanning velocity of the Michelson interferometer and is limited to about 10 ms at a wavelength resolution of 16 cm<sup>-1</sup> within high end research FTIR instruments. The implementation of a faster Michelson interferometer allows, in principle, for a higher time resolution, but with a conventional globar as the light source, signal to noise ratios (S/N) are not sufficient for single shot experiments on biological systems.<sup>8</sup> Only synchrotron irradiation and a dispersive setup in combination with an array detector permits single shot experiments with  $\mu$ s resolution.<sup>9</sup>

The recent development of dual comb QCL based spectrometers allows for  $\mu$ s time resolution as well, but with a much

smaller footprint.<sup>10,11</sup> In these instruments two broad band lasers that emit at many discrete wavelengths are used as the light source (Figure 1). The wavelength spacing of the first laser

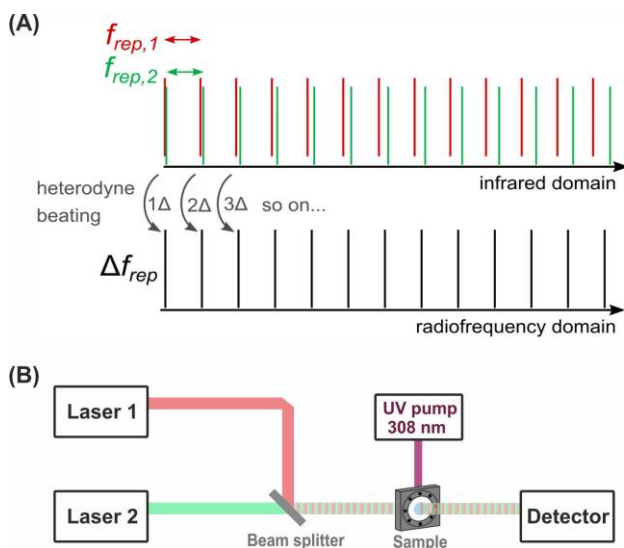

Figure 1: (A) Principle of dual comb spectroscopy. (B) Schematic of the setup of the dual-comb spectrometer used here, BS stands for beam splitter, S for sample and Det for detector.

( $f_{rep,1}$ ) is close but not identical to the other laser ( $f_{rep,2}$ ). Overlaying the two lasers produces a set of beatings spaced by  $\Delta f_{rep} = f_{rep,1} - f_{rep,2}$  in the radiofrequency domain measured by a high bandwidth MCT detector. From this measurement the entire heterodyne beating pattern can be recovered. In our setup  $\Delta f_{rep}$  leads to a time resolution of 4  $\mu$ s. The spectral window of the lasers is from 1207.0  $\text{cm}^{-1}$  to 1276.8  $\text{cm}^{-1}$ . By guiding the QCLs through a sample that is irradiated by a pulsed UV-laser, UV-light induced spectral changes of the sample can be obtained with the time resolution of 4  $\mu$ s.

Caged compounds<sup>12</sup> are a tool for the investigation of reactions of biological systems that can otherwise not be initiated by light. Caged compounds release the reactive compound upon irradiation and cannot be excited repetitively. Rapid-scan FTIR spectrometers usually have a time resolution of about 10 ms at 16  $\text{cm}^{-1}$  spectral resolution. Due to limited S/N the actual time-resolution for measuring protein reactions is often even slower and often artificial low-temperatures are necessary to slow down the reaction. Most prominently ATPases<sup>13</sup> and GTPases<sup>14</sup> were investigated in detail by means of caged nucleotides. As caged compounds the P<sup>3</sup>-[1-(2-nitrophenyl)ethyl] ester (NPE)<sup>15</sup> and the P<sup>3</sup>-[para-hydroxyphenacyl] ester (pHP)<sup>16</sup> of the nucleotides were used.

Here we used, for the first time, a dual comb QCL based spectrometer for the investigation of GTPases in the  $\mu$ s time-domain. First, we measured the photolysis reaction the two caged-GTPs, NPE-GTP<sup>15</sup> and pHP-GTP<sup>17</sup>, in solution without a protein present and compare the results with conventional rapid-scan FTIR. In the next step we applied the technique to the G $\alpha$  subunit of the heterotrimeric G $_i$  protein and monitor its GTPase reaction.<sup>18</sup> Finally, the RGS catalyzed reaction of G $\alpha_i$  was measured for the first time at ambient temperatures by time-resolved infrared spectroscopy. At room temperature, the reaction is completed before the first datapoint of a rapid-scan FTIR measurement can be recorded. With dual comb IR it is well resolved, including a so far unknown intermediate.

Photolysis of NPE-GTP does not produce GTP directly, first an intermediate, the aci-nitro anion is formed (Figure 2A).<sup>19</sup> Depending on the reaction conditions, GTP is formed from this intermediate, usually in the ms time regime. We measured NPE-GTP photolysis with both a Bruker Vertex 80v FTIR spectrometer and the IRsweep IRis-F1 dual-comb spectrometer (Figure 2).

The photolysis difference spectrum of the FTIR experiment can be compared with the same difference from the dual-comb experiment. In both cases the spectra are shown in a way that the newly formed absorptions are facing upwards and vanishing absorptions are facing downwards. Figure 2B shows that the spectra agree nicely. The spectral window of the dual comb experiment shows nicely the vanishing band of the combined asymmetric stretching vibrations of the phosphate groups of NPE-GTP.<sup>20</sup>

The same reaction was investigated before by a step-scan FTIR-experiment with 10  $\mu$ s time resolution at a spectral resolution of 15  $\text{cm}^{-1}$ .<sup>21</sup> The data were obtained within 5 hours of measurement time, using 200x200  $\mu\text{m}^2$  segments from five samples of 1  $\text{cm}^2$  area.<sup>22</sup> In comparison, the dual comb experiment was done with a single sample. Compared to the 5 hours of the step-scan FTIR experiment the dual comb measurement only took a few seconds. Further, much smaller amounts of sample are needed. The saving in sample consumption is about

a factor of 10 in our experiment but could be improved by another factor of 10 by using a cuvette optimized for the QCL profile. The diameter of the laser beam is about 3 mm and much smaller than the conventional IR cuvettes as shown in Supplemental Figure 1. The quantum yield of NPE-GTP hydrolysis with our 308 nm XeCl-excimer laser is limited. For this reason, we repeated the experiment 20 times with the same sample in the same position and coadded the observed changes. The sample response after each shot was monitored (Supplemental Figure 2). The kinetics in Figure 2B were obtained by combining the fast and slow measurement modes of the IRis-F1 (details of the data treatment are given in the Methods section). We measured a half-life of 46 ms at 293 K for the intermediate.

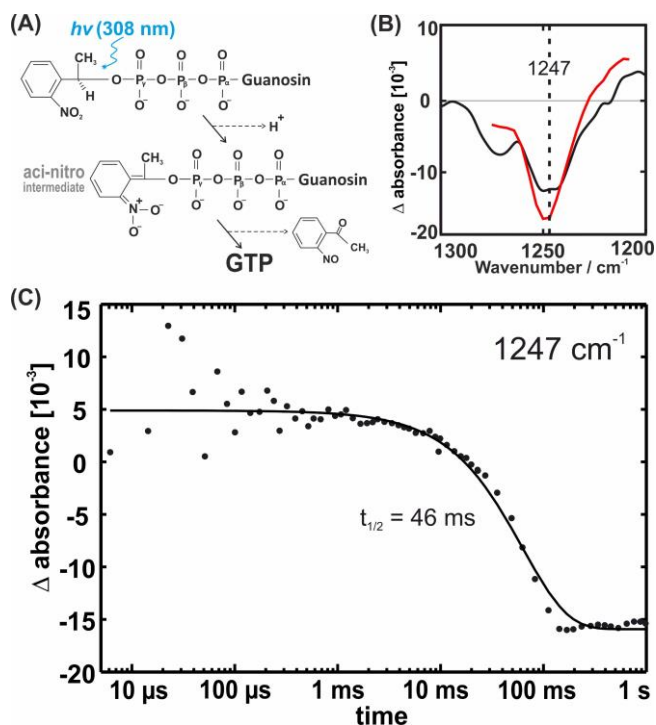

Figure 2: (A) Photolysis of NPE-GTP Reaction Scheme. (B) Kinetics of the hydrolysis reaction obtained by dual-comb experiments. (C) Photolysis spectra obtained by FTIR (black) and dual-comb (red).

pHP-GTP is the superior caged compound for the investigation of fast reactions because photolysis is fast and without an intermediate. Indeed, we observe very fast production of GTP from pHP-GTP with only one minor and very fast kinetic rate that might be a heat artefact (Supplemental Figure 3). For this reason, we use pHP-GTP for the protein reactions shown below.

The protein with its GTPase domain (orange) and all-alpha domain (yellow) is shown in Figure 3A. The central nucleotide is shown in a ball and sticks representation. Figure 3B shows the reaction scheme of G $\alpha_i$ . After irradiation with the 308 nm excimer laser, we expect the photolysis reaction and subsequently the hydrolysis. The hydrolysis reaction is slow and can be observed by rapid-scan FTIR as a control for our first dual comb experiments with a protein. Indeed, the amplitude spectra of photolysis and hydrolysis spectra nicely agree (Figure 3C&3D), and the single exponential kinetics (Figure 3E) is in line with the literature.<sup>18</sup> After having demonstrated the basic functioning of the dual comb technique for GTPase reactions of proteins, we want to investigate a very fast reaction, which cannot be observed at room temperature by FTIR.

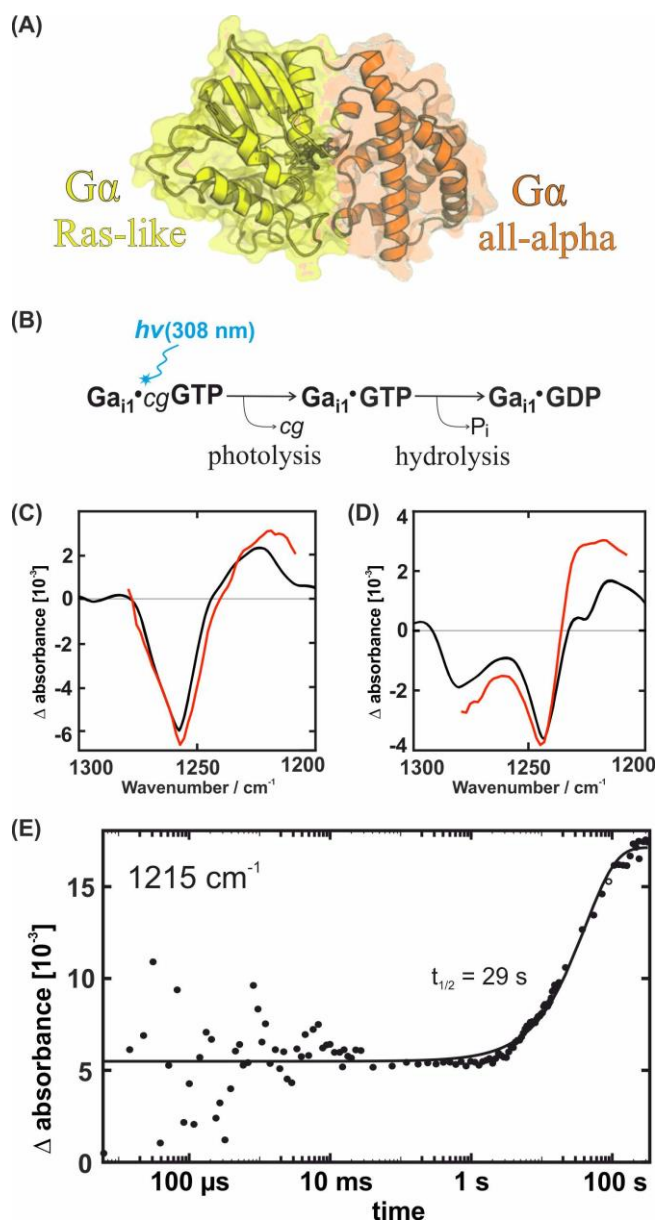

Figure 3: (A) Structural model of  $G\alpha_i$  from PDB ID. (B) Reaction scheme for the GTPase reaction of  $G\alpha_i$ . (C) Kinetics of the hydrolysis reaction. (D) Photolysis and (E) hydrolysis spectra obtained by FTIR (black) and dual-comb (red).

The RGS catalyzed reaction of  $G\alpha_i$  is much faster than the reaction of  $G\alpha_i$  alone and cannot be resolved by rapid-scan FTIR at ambient temperature. The first data-point in the FTIR measurements of these larger protein-protein complexes (Figure 4A) is usually above 100 ms (see e.g. Figure 2B in <sup>18</sup>). With the dual comb experiment our first datapoint is at 4  $\mu\text{s}$ . The kinetics at  $1240 \text{ cm}^{-1}$  show nicely the decay of the  $\alpha$ -GTP band due to the GTPase reaction.<sup>18</sup> Clearly, the reaction is almost completed at 100 ms, indicating that the reaction could not be observed by rapid scan FTIR at all. A half-life of 90 ms was obtained. Interestingly there are even two additional very fast rates (Figure 4C half-lives of 38  $\mu\text{s}$  and 86  $\mu\text{s}$ ) resolved, preceding hydrolysis. We can speculate that one rate corresponds to a heating artifact (as observed for pHP-GTP alone, Supplemental Figure 3) and the other to a fast rearrangement within the catalytic site. Such a rearrangement was also observed on a

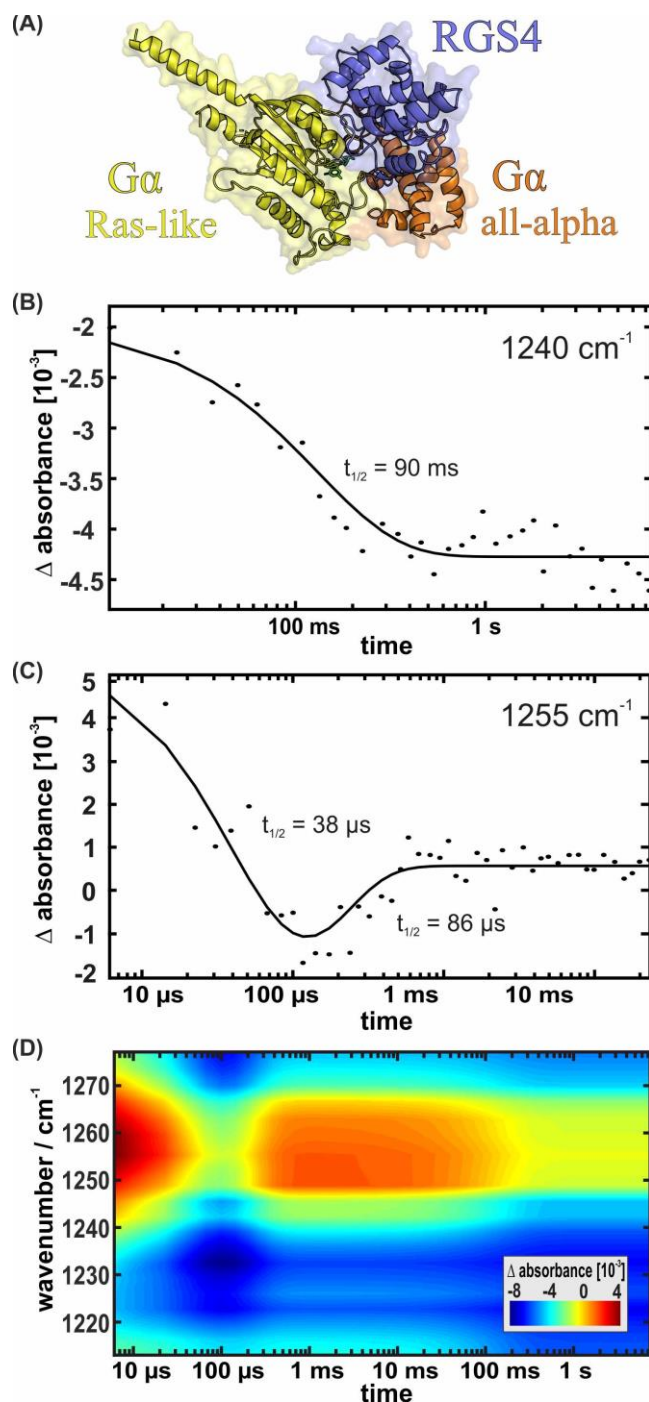

Figure 4: (A) Structural model of  $G\alpha_i$ -RGS from PDB ID. (B) Kinetics of the hydrolysis reaction of  $G\alpha_i$ -RGS. (C) Additional pre-hydrolysis rates obtained by dual comb IR. (D) 3D-plot of the changes.

slower timescale in a  $G\alpha_i$  mutant.<sup>23</sup> However, further experiments including the measurements of further  $G\alpha_i$  mutants will be necessary for a clear-cut assignment and is not within the scope of this work. The complete reaction with all the information obtained in the dual comb experiment is shown in Figure 4D.

Overall, we were able to show that the dual comb setup is very suitable for the investigation of proteins with caged compounds. The only drawback of the new technique is the relatively small spectral window of each dual comb setup. How-

ever, laser modules can be changed and modules for all interesting wavelengths between 2200-900  $\text{cm}^{-1}$  are available and with the ca. 100 times stronger source power single shot analyses of weak absorbers are possible. Another approach could be the measurement of full spectra by FTIR with slow time resolution and subsequent measurement of interesting regions with a dual comb setup.

We demonstrate that with a single sample, a time resolution in the  $\mu\text{s}$  regime can be obtained even for a larger protein-protein complex. In our setups we use a sample thickness of 60  $\mu\text{m}$ , a great advantage of the intense QCLs in comparison with FTIR, where we use about 10  $\mu\text{m}$  sample thickness. This alone should lead to an about 6 times larger S/N ratio. The larger path-length also allows for a much easier implementation of flow through setups using conventional microfluidics.

### Material and Methods

The  $\text{P}^3$ -[1-(2-nitrophenyl)ethyl] ester (NPE) of GTP was obtained from Jena Bioscience (Jena, Germany).  $\text{P}^3$ -[para-hydroxyphenacyl] ester (pHP) of GTP was synthesized by coupling GDP with pHP-caged  $\text{P}_i$ . pHP- $\text{P}_i$  was obtained in five steps from para-hydroxy-acetophenone and dibenzylphosphate.<sup>16</sup>

$\text{G}\alpha_{i1}$  and RGS proteins were expressed and purified as described by Mann et al.<sup>18</sup> In the purified proteins the nucleotide GDP was exchanged for pHP-GTP. The exchange rate was >95% as checked by reversed phase HPLC (LC-2010; Shimadzu) [mobile phase: 50 mM  $\text{P}_i$  (pH 6.5), 5 mM tetrabutylammoniumbromide, 7.5% (vol/vol) acetonitrile; stationary phase: ODS-Hypersil C18 column]. For the intrinsic  $\text{G}\alpha_{i1}$  measurements  $\text{G}\alpha_{i1}$ -pHP-GTP was lyophilized. For the samples, lyophilized protein was resuspended in buffer to reach the following concentrations: 5mM  $\text{G}\alpha_{i1}$ , 200 mM Hepes (pH 7.5), 150 mM NaCl, 5 mM  $\text{MgCl}_2$ , 200 mM DTT, and 0.1% (vol/vol) ethylene glycol. For the RGS catalyzed reactions a 1:1 molar ratio of  $\text{G}\alpha_{i1}$  with RGS was lyophilized and resuspended to reach 5mM  $\text{G}\alpha_{i1}$ -RGS, 100 mM Hepes (pH 7.5), 100 mM Tris (pH 7.5), 150 mM NaCl, 5 mM  $\text{MgCl}_2$ , 20 mM DTT, and 0.1%(vol/vol) ethylene glycol. The samples were packed between two  $\text{CaF}_2$  windows, separated by a spacer ring yielding a pathlength of about 60  $\mu\text{m}$ , that were sealed with silicon grease and mounted either in a Bruker Vertex80v spectrometer or an IRsweep IRis-F1 dual-comb spectrometer. All measurements were done at room temperature (293 K). The reactions were initiated by flashes of a XeCl-excimer laser (308 nm, 150 mJ, Coherent LPX Pro 240). FTIR measurements were recorded at 4  $\text{cm}^{-1}$  spectral resolution, manipulated by zero filling by a factor of 2, and Fourier-transformed using Mertz phase correction and Blackman-Harris three-term apodization function.

The time-resolved dual-comb IR data were obtained from combined fast (“time resolved”) and slow (“long term”) spectroscopic IRsweep difference spectroscopy measurements (as shown in Supplemental Figure 4), which were each logarithmically averaged. Before merging, the data were scaled according to the difference spectra at peaks wavenumber of each dataset. Furthermore, to avoid discontinuities, we allowed for ~15 ms overlap between both data sets. The originally recorded high spectral resolution of the IRsweep instrument at 0.34  $\text{cm}^{-1}$  was also averaged to 5  $\text{cm}^{-1}$  for better S/N.

The data was further analyzed by a global fit (Eq.1).<sup>14</sup> The time-resolved absorbance change  $\Delta A(\nu, t)$  is described by the absorbance change induced by photolysis  $a_{ph}(\nu)$  followed by a

number  $n$  of exponential functions fitting the amplitudes  $a$  for each wavenumber  $\nu$ .

$$\Delta A(\nu, t) = a_{ph}(\nu) + \sum_{i=1}^n a_i(\nu)(1 - e^{-k_i t}) \quad (\text{Eq. 1})$$

Due to the limited intensity of the excitation beam, not the complete sample is photolyzed by one laser flash. To estimate the amount of photolysis the signal strength at the most intense analyte peak (1253  $\text{cm}^{-1}$ ) was integrated over the first 2 ms after excitation as a function of sample excitation number. This was repeated for the negative times (-2 to 0 ms) as a control, as no spectral features are expected there. Supplemental Figure 2 indicates that for NPE-GTP after 20 excitations, no further photolysis occurs. For pHP-GTP after 10-15 excitations, no further photolysis is observed (Supplemental Figure 3) and the data shown are the averages of the first 10 excitations.

## ASSOCIATED CONTENT

### Supporting Information

The Supporting Information is available free of charge on the ACS Publications website.

Supporting Figure 1: Comparison of the conventional IR cuvette with the beam diameter of the QCL.

Supporting Figure 2: Photolysis signal development during an experiment.

Supporting Figure 3: Photolysis of pHP-GTP.

Supporting Figure 4: Slow and fast mode of the dual comb instrument.

## AUTHOR INFORMATION

### Corresponding Author

\* carsten.koetting@rub.de

## ACKNOWLEDGMENT

We thank Daniel Mann for the preparation of  $\text{G}\alpha_{i1}$  and Christian Teuber, Adrian Höveler and Kristin Labudda for help with the sample preparation. We further thank Dr. Jonas Schartner for the synthesis of pHP-GTP. This work was supported by Deutsche Forschungsgemeinschaft (DFG, German Research Foundation), individual Research Grant GE 599/20-1 to KG and KO 3813/1-1 to CK and Research Training Group 2341 ‘MiCon’. Further support was provided by the Ministry for Culture and Science (MKW) of North Rhine-Westphalia (Germany) through grant 111.08.03.05-133974 and the Protein Research Unit Ruhr within Europe (PURE) funded by the Ministry of Innovation, Science and Research (MIWF) of North-Rhine Westphalia (Germany).

## REFERENCES

- (1) Lorenz-Fonfria, V. A. *Chem. Rev.* **2020**, *120* (7), 3466–3576.
- (2) Schultz, B.-J.; Mohrmann, H.; Lorenz-Fonfria, V. A.; Heberle, J. *Spectrochim. Acta. A. Mol. Biomol. Spectrosc.* **2018**, *188*, 666–674.
- (3) Rammelsberg, R.; Hessling, B.; Chorongiewski, H.; Gerwert, K. *Appl. Spectrosc.* **1997**, *51* (4), 558–562.
- (4) Sanchez, M. L. K.; Sommer, C.; Reijerse, E.; Birrell, J. A.; Lubitz, W.; Dyer, R. B. *J. Am. Chem. Soc.* **2019**, *141* (40), 16064–16070.
- (5) Neumann-Verhoeven, M.-K.; Neumann, K.; Bamann, C.; Radu, I.; Heberle, J.; Bamberg, E.; Wachtveitl, J. *J. Am. Chem. Soc.* **2013**, *135* (18), 6968–6976.
- (6) Lin, J.; Gerwert, K.; Kötting, C. *Appl. Spectrosc.* **2014**, *68* (5), 531–535.

- (7) Souvignier, G.; Gerwert, K. *Biophys. J.* **1992**, *63* (5), 1393–1405.
- (8) Süß, B.; Ringleb, F.; Heberle, J. *Rev. Sci. Instrum.* **2016**, *87* (6), 063113.
- (9) Ritter, E.; Puskar, L.; Aziz, E. F.; Hofmann, K.-P.; Hegemann, P.; Schade, U. In *2017 42nd International Conference on Infrared, Millimeter, and Terahertz Waves (IRMMW-THz)*; IEEE: Cancun, Mexico, 2017; pp 1–2.
- (10) Klocke, J. L.; Mangold, M.; Allmendinger, P.; Hugi, A.; Geiser, M.; Jouy, P.; Faist, J.; Kottke, T. *Anal. Chem.* **2018**, *90* (17), 10494–10500.
- (11) Lins, E.; Read, S.; Unni, B.; Rosendahl, S. M.; Burgess, I. J. *Anal. Chem.* **2020**, *92* (9), 6241–6244.
- (12) Klán, P.; Šolomek, T.; Bochet, C. G.; Blanc, A.; Givens, R.; Rubina, M.; Popik, V.; Kostikov, A.; Wirz, J. *Chem. Rev.* **2013**, *113* (1), 119–191.
- (13) Barth, A.; Kreutz, W.; Mäntele, W. *FEBS Lett.* **1990**, *277* (1–2), 147–150.
- (14) Kötting, C.; Gerwert, K. *Biol. Chem.* **2015**, *396* (2), 131–144.
- (15) Walker, J. W.; Reid, G. P.; McCray, J. A.; Trentham, D. R. *J. Am. Chem. Soc.* **1988**, *110* (21), 7170–7177.
- (16) Park, C.-H.; Givens, R. S. *J. Am. Chem. Soc.* **1997**, *119* (10), 2453–2463.
- (17) Givens, R. S.; Rubina, M.; Wirz, J. *Photochem. Photobiol. Sci.* **2012**, *11* (3), 472.
- (18) Mann, D.; Teuber, C.; Tennigkeit, S. A.; Schröter, G.; Gerwert, K.; Kötting, C. *Proc. Natl. Acad. Sci. U. S. A.* **2016**, *113* (50), E8041–E8050.
- (19) Barth, A.; Hauser, K.; Maentele, W.; Corrie, J. E. T.; Trentham, D. R. *J. Am. Chem. Soc.* **1995**, *117* (41), 10311–10316.
- (20) Cepus, V.; Ulbrich, C.; Allin, C.; Troullier, A.; Gerwert, K. In *Methods in Enzymology*; Elsevier, 1998; Vol. 291, pp 223–245.
- (21) Gerwert, K., patent WO1999040413A1.
- (22) Rammelsberg, R.; Boulas, S.; Chorngiewski, H.; Gerwert, K. *Vib. Spectrosc.* **1999**, *19* (1), 143–149.
- (23) Mann, D.; Höweler, U.; Kötting, C.; Gerwert, K. *Biophys. J.* **2017**, *112* (1), 66–77.
-
